# Supplementary material for: Large Farm Animals Used for Research Purposes: A Survey on Purchase, Housing and Hygiene Management
Source: MDPI journal article supplement (doi:10.3390/ani11082158), 2021-07-21
Supplement: s1 [file s1]

**Table S1: Questions and answer possibilities from the survey**

| <b>Part</b> | <b>Question</b>                                                                                                                                                    | <b>Possible answers</b>                                                                                   |
|-------------|--------------------------------------------------------------------------------------------------------------------------------------------------------------------|-----------------------------------------------------------------------------------------------------------|
| <b>1</b>    | <b>Please provide detailed information about the nature of your facility, the housed species, the housing capacities and the age groups of the housed animals.</b> |                                                                                                           |
|             |                                                                                                                                                                    |                                                                                                           |
|             | <b>Research focus</b>                                                                                                                                              |                                                                                                           |
|             | <b>medical</b>                                                                                                                                                     | <b>no</b>                                                                                                 |
|             |                                                                                                                                                                    | <b>no information</b>                                                                                     |
|             |                                                                                                                                                                    | <b>yes: translational medical research; veterinary medicine research; behaviour research; other topic</b> |
|             | <b>agricultural</b>                                                                                                                                                | <b>no</b>                                                                                                 |
|             |                                                                                                                                                                    | <b>no information</b>                                                                                     |
|             |                                                                                                                                                                    | <b>yes: consumer protection; animal husbandry; animal nutrition; behavioural research; other topic</b>    |
|             | <b>breeding</b>                                                                                                                                                    | <b>no</b>                                                                                                 |
|             |                                                                                                                                                                    | <b>no information</b>                                                                                     |
|             |                                                                                                                                                                    | <b>yes: own use; experimental animal breeder with delivery to other user</b>                              |
|             | <b>housed age groups</b>                                                                                                                                           | <b>no information</b>                                                                                     |
|             |                                                                                                                                                                    | <b>young animals (before sexual maturity)</b>                                                             |
|             |                                                                                                                                                                    | <b>adults (after sexual maturity)</b>                                                                     |
|             |                                                                                                                                                                    | <b>young and adults</b>                                                                                   |
|             | <b>housing capacities</b>                                                                                                                                          | <b>no information</b>                                                                                     |
|             |                                                                                                                                                                    | <b>&lt;30</b>                                                                                             |
|             |                                                                                                                                                                    | <b>&gt;30</b>                                                                                             |
|             |                                                                                                                                                                    | <b>&gt;100</b>                                                                                            |
|             |                                                                                                                                                                    |                                                                                                           |
| <b>2</b>    | <b>Please indicate what measures are implemented for new animal arrivals at your facility(ies).</b>                                                                |                                                                                                           |
|             | <b>no access restriction</b>                                                                                                                                       | <b>yes</b>                                                                                                |
|             |                                                                                                                                                                    | <b>no</b>                                                                                                 |
|             |                                                                                                                                                                    | <b>no information</b>                                                                                     |
|             | <b>strict barrier (clean/unclean side)</b>                                                                                                                         | <b>yes</b>                                                                                                |
|             |                                                                                                                                                                    | <b>no</b>                                                                                                 |
|             |                                                                                                                                                                    | <b>no information</b>                                                                                     |
|             | <b>restrictive personal access</b>                                                                                                                                 | <b>yes</b>                                                                                                |
|             |                                                                                                                                                                    | <b>no</b>                                                                                                 |
|             |                                                                                                                                                                    | <b>no information</b>                                                                                     |
|             | <b>change of clothes and shoes</b>                                                                                                                                 | <b>yes</b>                                                                                                |

|   |                                                                       |                                                     |
|---|-----------------------------------------------------------------------|-----------------------------------------------------|
|   |                                                                       | no                                                  |
|   |                                                                       | no information                                      |
|   | hood/mouthguard/gloves                                                | yes                                                 |
|   |                                                                       | no                                                  |
|   |                                                                       | no information                                      |
|   | showering                                                             | yes                                                 |
|   |                                                                       | no                                                  |
|   |                                                                       | no information                                      |
|   |                                                                       |                                                     |
| 3 | Please indicate the germ reduction procedures you have carried out.   |                                                     |
|   | ventilation                                                           | overpressure ventilation with HEPA filter           |
|   |                                                                       | overpressure ventilation without HEPA filter        |
|   |                                                                       | Vacuum ventilation with HEPA filter                 |
|   |                                                                       | Vacuum ventilation without HEPA filter              |
|   |                                                                       | none                                                |
|   |                                                                       | no information                                      |
|   | water                                                                 | Tap water                                           |
|   |                                                                       | Germ-reduced tap water                              |
|   |                                                                       | no information                                      |
|   | ready feed                                                            | yes                                                 |
|   |                                                                       | no                                                  |
|   |                                                                       | no information                                      |
|   | roughage                                                              | yes                                                 |
|   |                                                                       | no                                                  |
|   |                                                                       | no information                                      |
|   | green fodder                                                          | yes                                                 |
|   |                                                                       | no                                                  |
|   |                                                                       | no information                                      |
|   | bedding                                                               | straw                                               |
|   |                                                                       | Germ-reduced straw                                  |
|   |                                                                       | none                                                |
|   |                                                                       | no information                                      |
|   |                                                                       |                                                     |
| 4 | Please provide information from where you purchase your farm animals. |                                                     |
|   | special breeder                                                       | own breeding                                        |
|   |                                                                       | own breeding and breeder for laboratory animals,    |
|   |                                                                       | own breeding and varying laboratory animal breeders |
|   |                                                                       | own breeding and trader obtaining from a constant   |

|  |                      |                                                                                           |
|--|----------------------|-------------------------------------------------------------------------------------------|
|  |                      | breeder for laboratory animals,                                                           |
|  |                      | own breeding and trader obtaining from varying, known breeders for laboratory animals     |
|  |                      | own breeding and trader obtaining from varying, unknown breeders for laboratory animals , |
|  |                      | constant breeder for laboratory animals                                                   |
|  |                      | varying breeder for laboratory animals                                                    |
|  |                      | trader obtaining from constant breeder for laboratory animals                             |
|  |                      | trader obtaining from varying, known breeders for laboratory animals                      |
|  |                      | trader obtaining from varying, unknown breeders for laboratory animals                    |
|  |                      | no information                                                                            |
|  | livestock production | constant farm,                                                                            |
|  |                      | varying farms                                                                             |
|  |                      | trader obtaining from constant farm,                                                      |
|  |                      | trader obtaining from varying, known farms                                                |
|  |                      | dealer obtaining from unknown varying farms,                                              |
|  |                      | constant farm and own breeding                                                            |
|  |                      | varying farms and own breeding                                                            |
|  |                      | dealer obtaining from constant farm and own breeding                                      |
|  |                      | dealer obtaining from varying, known farms and own breeding,                              |
|  |                      | trader obtaining from varying, unknown farms and own breeding                             |
|  |                      | constant farm and breeder for laboratory animals,                                         |

|   |                                                                                                  |                                                                                                   |
|---|--------------------------------------------------------------------------------------------------|---------------------------------------------------------------------------------------------------|
|   |                                                                                                  | constant farm and trader obtaining from a breeder for laboratory animals                          |
|   |                                                                                                  | varying farms and varying breeders for laboratory animals,                                        |
|   |                                                                                                  | varying farms and trader obtaining from varying, known breeders for laboratory animals,           |
|   |                                                                                                  | trader obtaining from varying, unknown farms and varying, unknown breeders for laboratory animals |
|   |                                                                                                  | no information                                                                                    |
| 5 | Please give information about the health status of the animals and performed hygiene monitoring. |                                                                                                   |
|   | transported separately when obtained from different origins                                      | transport separately                                                                              |
|   |                                                                                                  | transport not separately                                                                          |
|   |                                                                                                  | no information.                                                                                   |
|   | purchased with health certificate                                                                | yes                                                                                               |
|   |                                                                                                  | no                                                                                                |
|   |                                                                                                  | no information                                                                                    |
|   | purchased without health certificate                                                             | yes                                                                                               |
|   |                                                                                                  | no                                                                                                |
|   |                                                                                                  | no information                                                                                    |
|   | health certificate including the history of infectious diseases in the past                      | yes                                                                                               |
|   |                                                                                                  | no                                                                                                |
|   |                                                                                                  | no information                                                                                    |
|   | health certificate including serological results                                                 | yes                                                                                               |
|   |                                                                                                  | no                                                                                                |
|   |                                                                                                  | no information                                                                                    |
|   | health certificate including parasitological results                                             | yes                                                                                               |
|   |                                                                                                  | no                                                                                                |
|   |                                                                                                  | no information                                                                                    |
|   | health certificate including bacteriological results                                             | yes                                                                                               |
|   |                                                                                                  | no                                                                                                |
|   |                                                                                                  | no information                                                                                    |
|   | health certificate includes the exclusion of a pregnancy                                         | yes                                                                                               |
|   |                                                                                                  | no                                                                                                |
|   |                                                                                                  | no information                                                                                    |

|   |                                                                                                         |                                                                          |
|---|---------------------------------------------------------------------------------------------------------|--------------------------------------------------------------------------|
|   | performance of ultrasound to exclude a pregnancy                                                        | yes                                                                      |
|   |                                                                                                         | no                                                                       |
|   |                                                                                                         | no information                                                           |
|   | medicinal treatment to exclude a pregnancy                                                              | yes                                                                      |
|   |                                                                                                         | no                                                                       |
|   |                                                                                                         | no information                                                           |
|   | separate housing of different genders to exclude a pregnancy                                            | yes                                                                      |
|   |                                                                                                         | no                                                                       |
|   |                                                                                                         | no information                                                           |
|   |                                                                                                         |                                                                          |
| 6 | Please describe your quarantine and prophylactic measures and the restocking procedure of housing rooms |                                                                          |
|   | quarantine management                                                                                   | no quarantine                                                            |
|   |                                                                                                         | Routine/Holding of origin                                                |
|   |                                                                                                         | Routine/in own holding (animal husbandry)                                |
|   |                                                                                                         | in suspected cases in own animal husbandry                               |
|   |                                                                                                         | no information                                                           |
|   | prophylactic treatments                                                                                 | none                                                                     |
|   |                                                                                                         | single antiparasitic treatment own animal husbandry                      |
|   |                                                                                                         | repeated antiparasitic treatment own animal husbandry                    |
|   |                                                                                                         | single antiparasitic treatment holding of origin                         |
|   |                                                                                                         | repeated antiparasitic treatment holding of origin                       |
|   |                                                                                                         | single vaccination in own animal husbandry                               |
|   |                                                                                                         | repeated vaccination in own animal husbandry                             |
|   |                                                                                                         | single vaccination in holding of origin                                  |
|   |                                                                                                         | repeated vaccination in holding of origin                                |
|   |                                                                                                         | single vaccination and antiparasitic treatment in own animal husbandry   |
|   |                                                                                                         | repeated vaccination and antiparasitic treatment in own animal husbandry |

|   |                                                      |                                                                             |
|---|------------------------------------------------------|-----------------------------------------------------------------------------|
|   |                                                      | single vaccination and<br>antiparasitic treatment in<br>holding of origin   |
|   |                                                      | repeated vaccination and<br>antiparasitic treatment in<br>holding of origin |
|   |                                                      | no information                                                              |
|   | restocking procedure                                 | yes                                                                         |
|   |                                                      | no                                                                          |
|   |                                                      | no information                                                              |
|   |                                                      |                                                                             |
| 7 | Please describe the health and hygiene measures      |                                                                             |
|   | general information                                  | not established yet                                                         |
|   |                                                      | routinely                                                                   |
|   |                                                      | in suspected cases                                                          |
|   |                                                      | no information                                                              |
|   | animal section internally                            | never                                                                       |
|   |                                                      | in suspected cases                                                          |
|   |                                                      | routinely                                                                   |
|   |                                                      | in suspected cases with<br>histology                                        |
|   |                                                      | routinely with histology                                                    |
|   |                                                      | no information                                                              |
|   | animal section externally                            | never                                                                       |
|   |                                                      | in suspected cases                                                          |
|   |                                                      | routinely                                                                   |
|   |                                                      | in suspected cases with<br>histology                                        |
|   |                                                      | routinely with histology                                                    |
|   |                                                      | no information                                                              |
|   |                                                      |                                                                             |
| 8 | Please provide information about animal<br>husbandry |                                                                             |
|   | single+stable (all year)                             | yes                                                                         |
|   |                                                      | no                                                                          |
|   |                                                      | no information                                                              |
|   | group+stable (all year)                              | yes                                                                         |
|   |                                                      | no                                                                          |
|   |                                                      | no information                                                              |
|   | group+stable (all year)+single possible              | yes                                                                         |
|   |                                                      | no                                                                          |
|   |                                                      | no information                                                              |
|   | group+stable+pasture (temporary)                     | yes                                                                         |
|   |                                                      | no                                                                          |
|   |                                                      | no information                                                              |

|   |                                                                                      |                                                                                           |
|---|--------------------------------------------------------------------------------------|-------------------------------------------------------------------------------------------|
|   | group+pasture (all year)                                                             | yes                                                                                       |
|   |                                                                                      | no                                                                                        |
|   |                                                                                      | no information                                                                            |
|   | Group+pasture (all year)+single housing possible                                     | yes                                                                                       |
|   |                                                                                      | no                                                                                        |
|   |                                                                                      | no information                                                                            |
|   |                                                                                      |                                                                                           |
| 9 | Please provide information about end of procedure or breeding exclusion (end of use) |                                                                                           |
|   | program to share organs/tissues                                                      | no                                                                                        |
|   |                                                                                      | internal program                                                                          |
|   |                                                                                      | external program                                                                          |
|   |                                                                                      | internal and external programm                                                            |
|   |                                                                                      | no information                                                                            |
|   | animal release                                                                       | no                                                                                        |
|   |                                                                                      | yes, private                                                                              |
|   |                                                                                      | yes, commercial                                                                           |
|   |                                                                                      | yes, private and commercial                                                               |
|   |                                                                                      | no information                                                                            |
|   | slaughter                                                                            | no                                                                                        |
|   |                                                                                      | in-house slaughtering                                                                     |
|   |                                                                                      | animal release and external slaughtering                                                  |
|   |                                                                                      | animal release and external slaughtering (with authority veterinarian certification)      |
|   |                                                                                      | in-house slaughtering + external slaughtering                                             |
|   |                                                                                      | in-house slaughtering + external slaughtering (with authority veterinarian certification) |
|   |                                                                                      | no information                                                                            |
